# Supplementary material for: Optimizing Agronomy Improves Super Hybrid Rice Yield and Nitrogen Use Efficiency through Enhanced Post-Heading Carbon and Nitrogen Metabolism
Source: MDPI journal article supplement (doi:10.3390/agronomy13010013), 2022-12-21
Supplement: s1 [file s1]

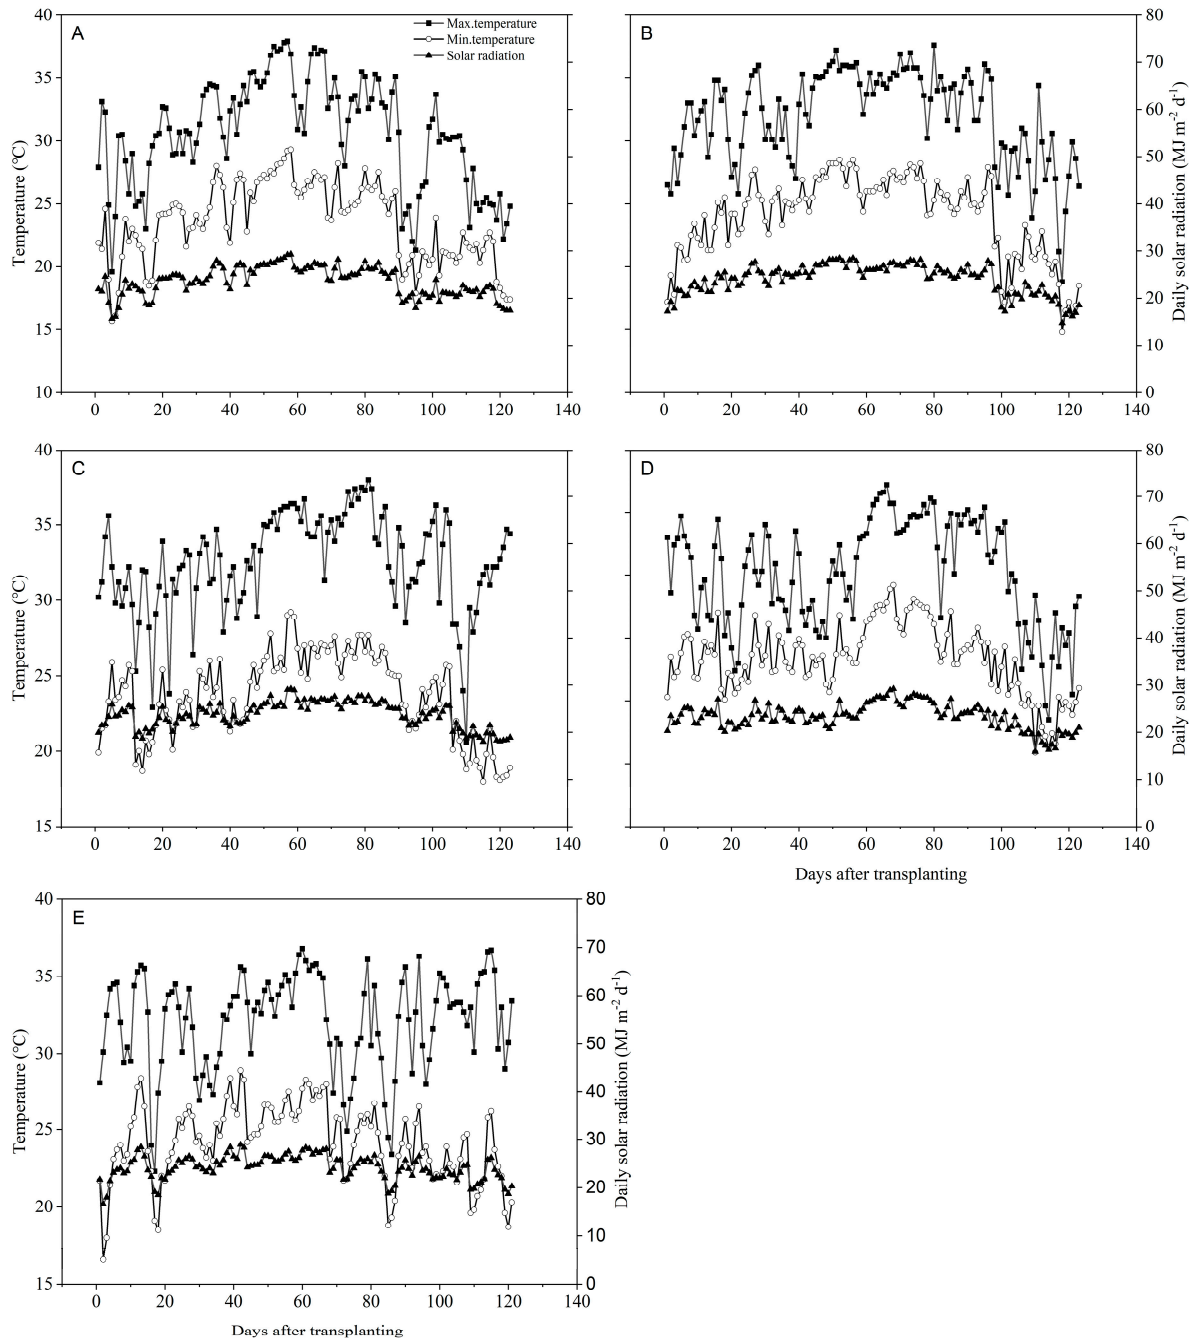

**Figure S1.** Daily maximum temperature, minimum temperature, and solar radiation from transplanting to maturity in 2017(A), 2018(B), 2019(C), 2020 (D) and 2021 (E) in Jingzhou, Hubei Province, China.
